# Supplementary material
Source: HighWire-hosted journal article supplement (https://www.genetics.org/content/suppl/2015/10/27/genetics.115.179010)

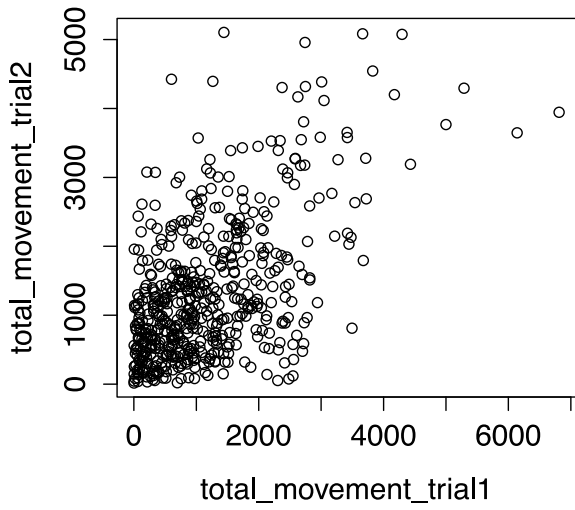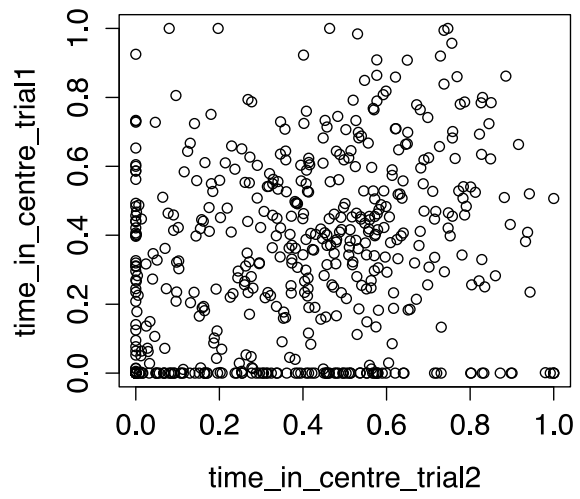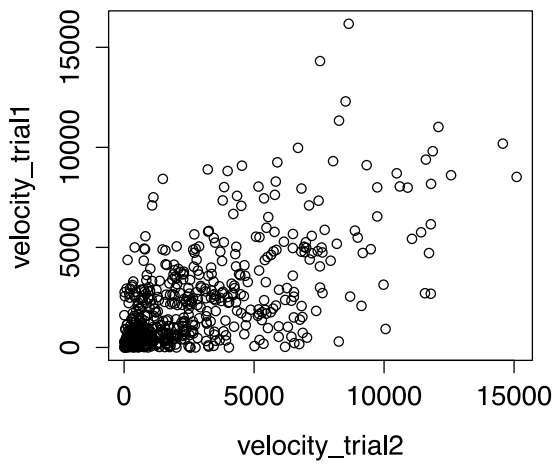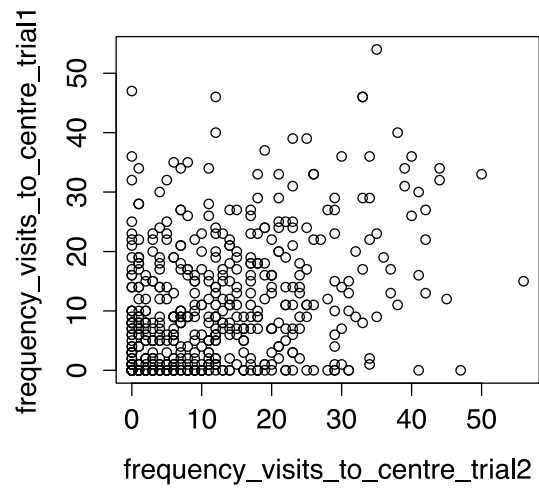

**Figure S1.** Scatter plots of behavioural phenotypes between the first and second trials

Supplement: FigureS1.pdf [file FigureS1.pdf]
